# Supplementary material for: Structural Insights into σ1 Receptor Interactions with Opioid Ligands by Molecular Dynamics Simulations
Source: PubMed Central journal article supplement (PMC6017133; doi:10.3390/molecules23020456), 2018-02-18
Supplement: molecules-23-00456-s001.pdf [file molecules-23-00456-s001.pdf]

**Supplementary Materials**  
to  
**Structural insights into  $\sigma_1$  receptor interactions with  
opioid ligands by molecular dynamics simulations**

Mateusz Kurciński, \*<sup>1</sup> Małgorzata Jarończyk,<sup>2</sup> Piotr F. J. Lipiński,<sup>3</sup>  
Jan Cz. Dobrowolski,<sup>2</sup> Joanna Sadlej \*<sup>2,4</sup>

<sup>1</sup> Faculty of Chemistry, University of Warsaw, Pasteur Str.1, 02-093 Warsaw, Poland

<sup>2</sup> National Medicines Institute, 30/34 Chelmska Str., 00-725 Warsaw, Poland

<sup>3</sup> Department of Neuropeptides, Mossakowski Medical Research Center, Polish Academy of Sciences, 02-106 Warsaw, Poland

<sup>4</sup> Faculty of Mathematics and Natural Sciences. Cardinal Stefan Wyszyński University, 1/3 Wóycickiego Str., 01-938 Warsaw, Poland

E-mails: [mkurc@chem.uw.edu.pl](mailto:mkurc@chem.uw.edu.pl), [m.jaronczyk@nil.gov.pl](mailto:m.jaronczyk@nil.gov.pl), [plipin@icm.edu.pl](mailto:plipin@icm.edu.pl),  
[j.dobrowolski@nil.gov.pl](mailto:j.dobrowolski@nil.gov.pl), [j.sadlej@uksw.edu.pl](mailto:j.sadlej@uksw.edu.pl)

Fig. S1. The average RMSD of the ligand-receptor complexes: FENT, HALO, MORPH, *R*- and *S*-PTZ, *R*- and *S*-PHZ; x (psec), y(Å).

Fig. S2. 2D schematic representation of the interaction between the  $\sigma_1$  receptor and the seven ligands: FENT, HALO, MORPH, *R*- and *S*-PTZ, *R*- and *S*-PHZ.

Figure S3. Spectrum of the frequency of the contacts between receptor residues and atomic centers of ligands.

Figure S4, a-g. Spectrum of frequency of ligand contacts with receptor residues normalized according to the hydrophobic scale. The positive bars correspond to hydrophobic while negative to hydrophilic contacts.

Table S5. The contacts between residues in receptor-ligand detected in the final MD snapshots. The names of different regions of the ligands: Ar1, Ar2, Ar(T), chair, Link, Me, -CH<sub>2</sub>, see Fig.3.

Fig.S1. The average RMSD of the ligand-receptor complexes: FENT, HALO, MORPH, *R*- and *S*-PTZ, *R*- and *S*-PHZ; x (psec), y(Å).

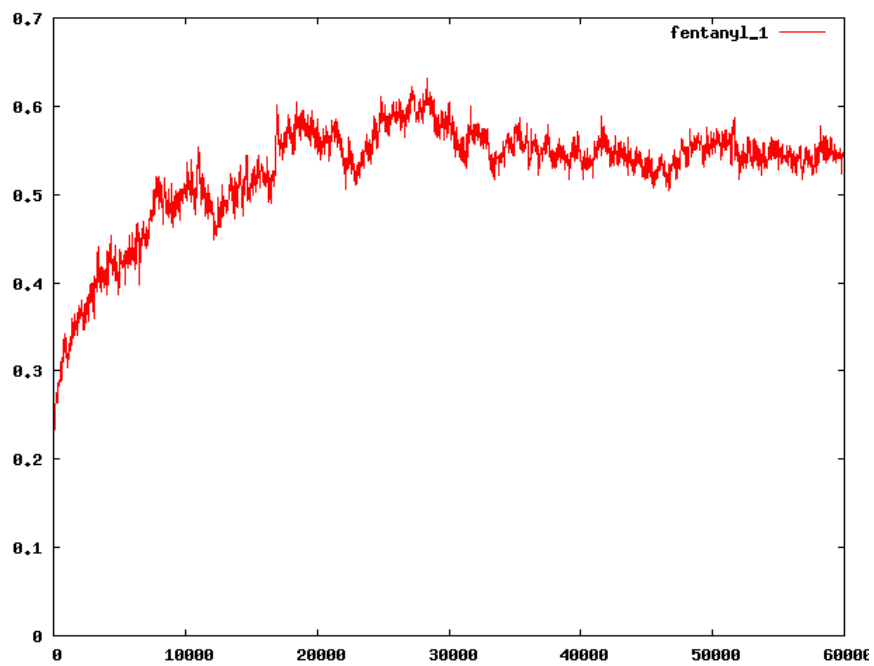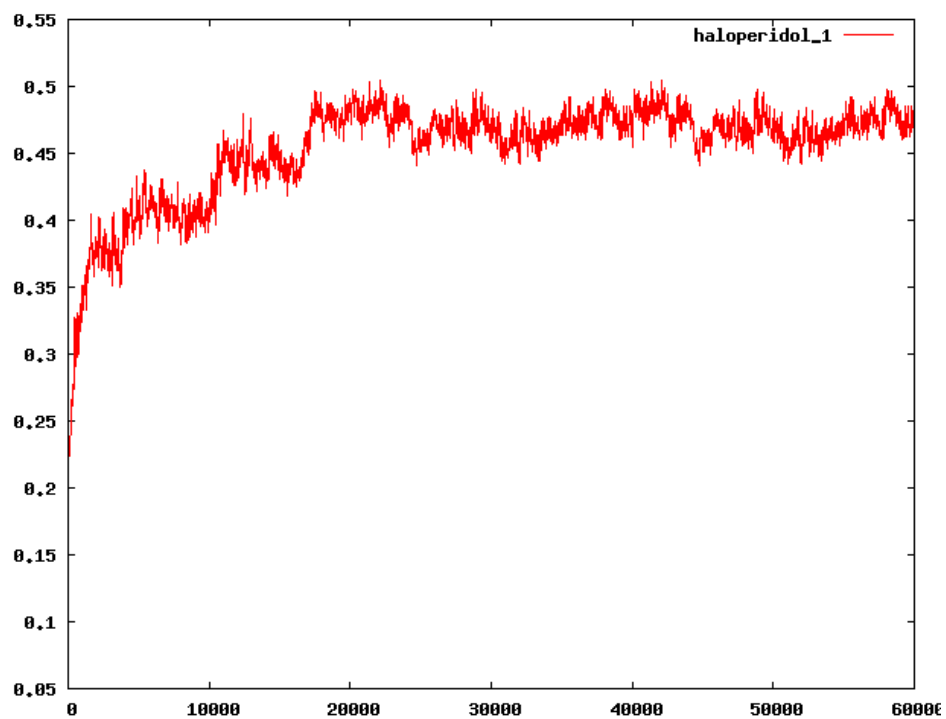

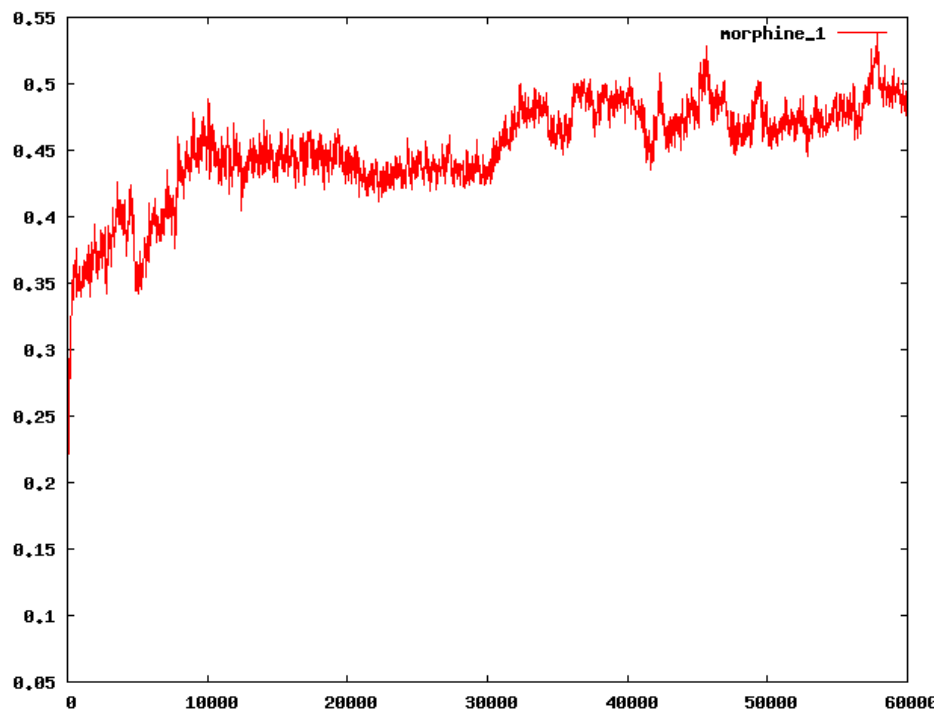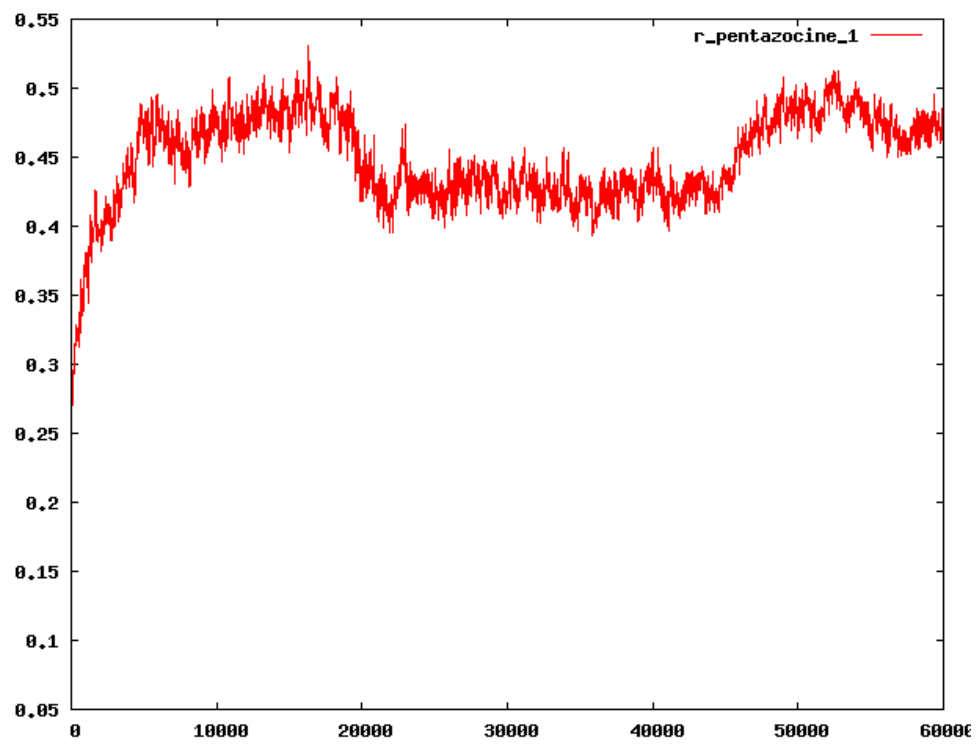

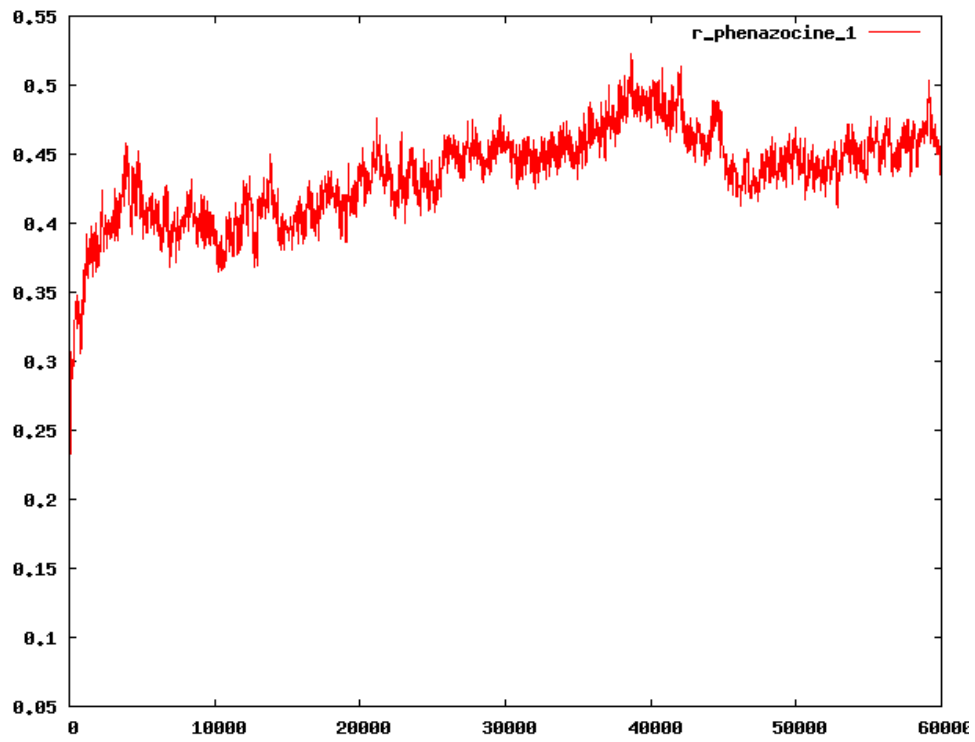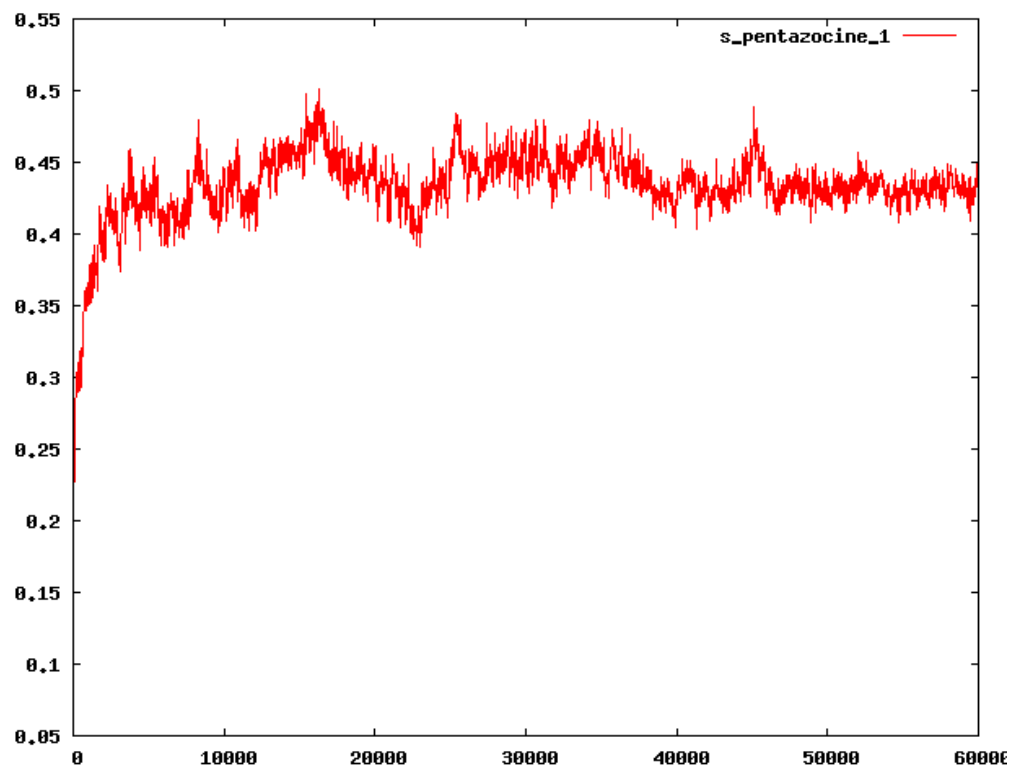

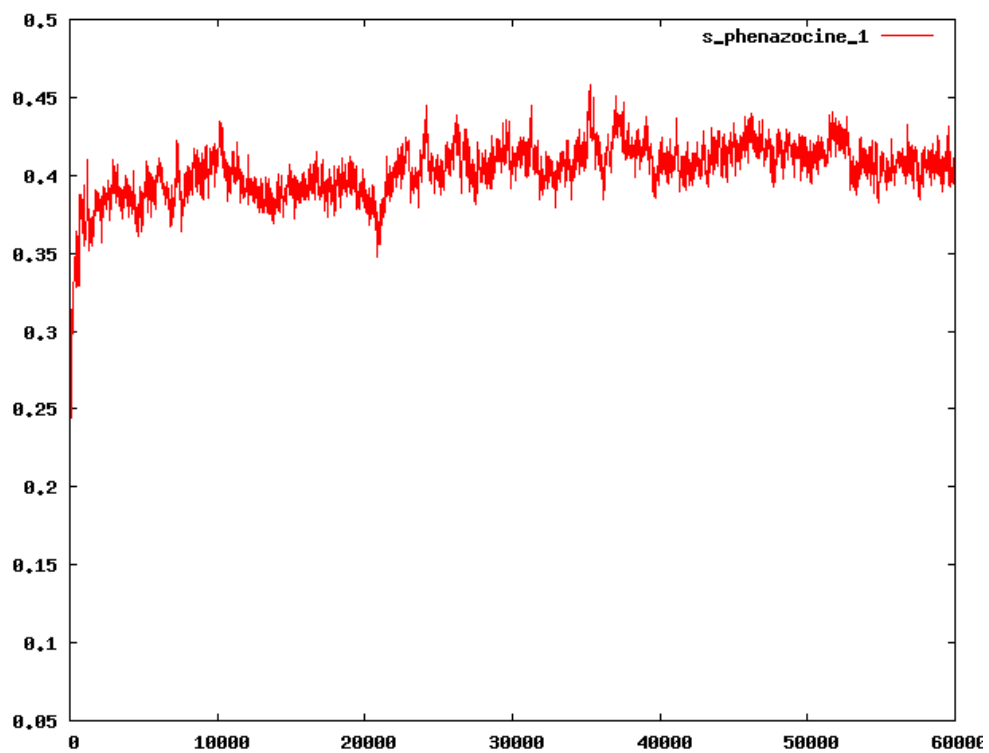

Fig.S2. 2D schematic representation of the interaction between the  $\sigma_1$  receptor and the seven ligands: FENT, HALO, MORPH, *R*- and *S*-PTZ, *R*- and *S*-PHZ.

(a) FENT

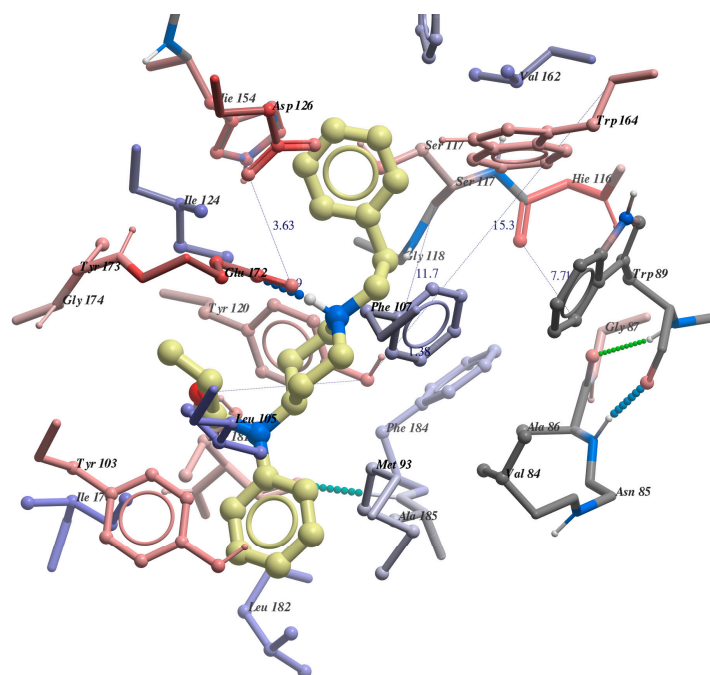

(b) HALO

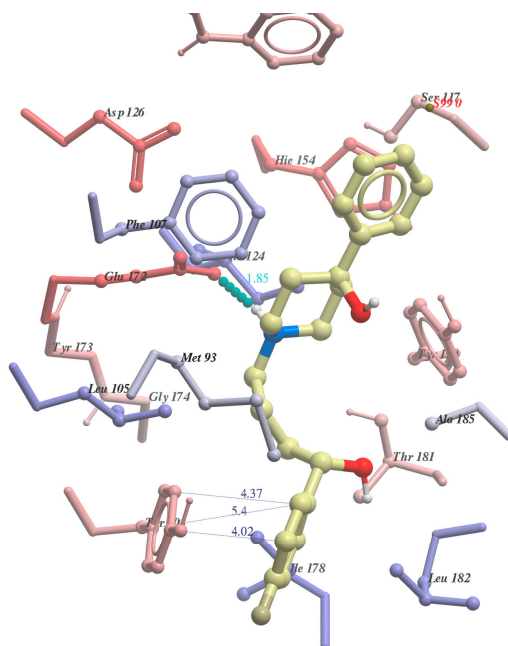

(c) MORPH

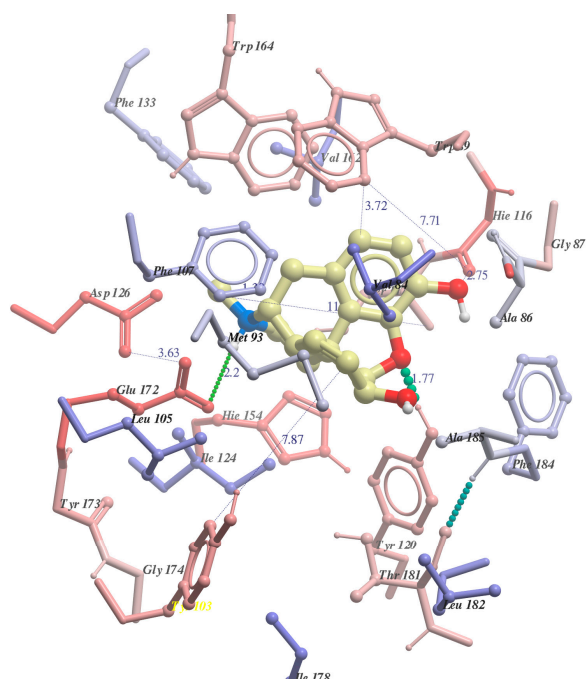

(d) S-PTZ

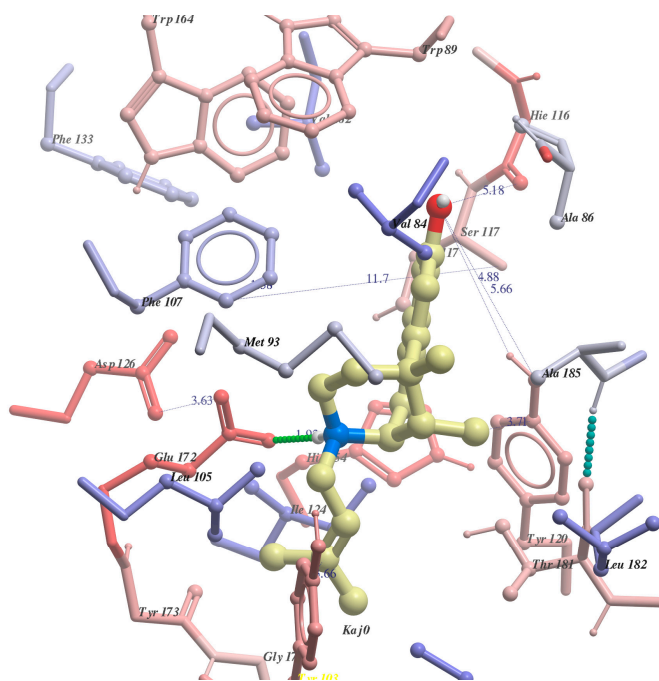

(e) *R*-PTZ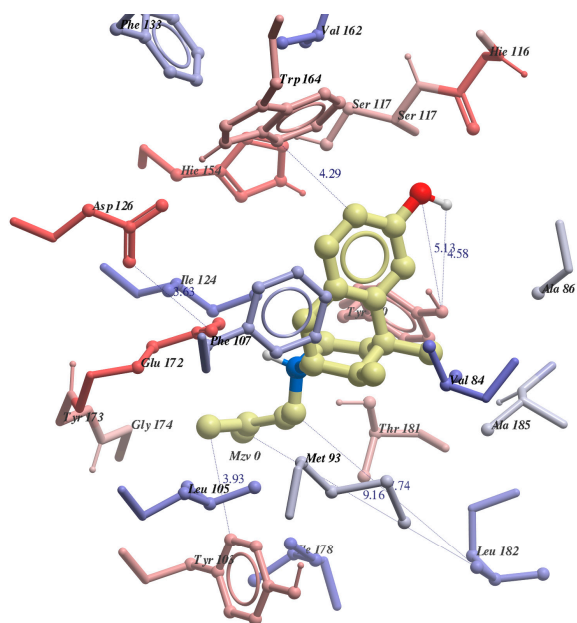(f) *R*-PHZ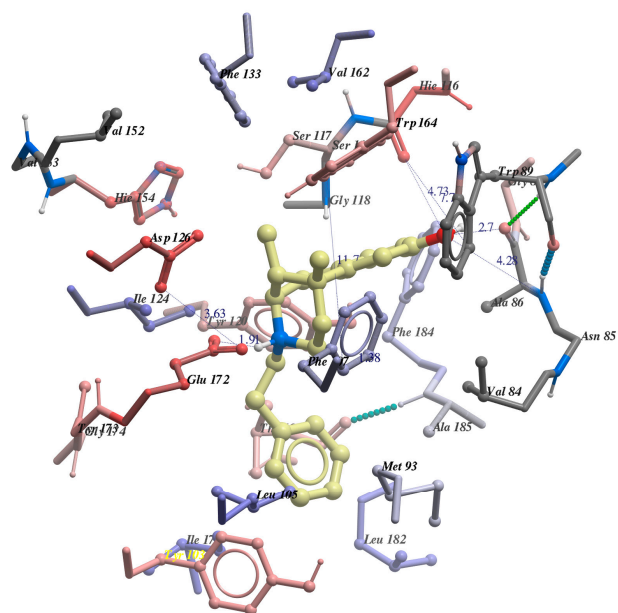(g) *S*-PHZ



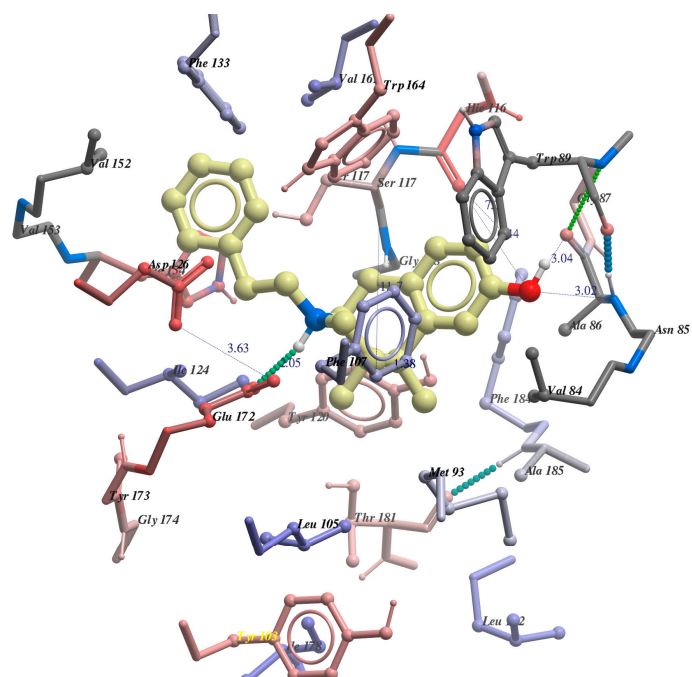

Table S1. The contacts between residues in receptor-ligand detected in the final MD snapshots. The names of different regions of the ligands: Ar1, Ar2, Ar(T), chair, Link, Me, -CH<sub>2</sub>, see Fig.3.

| Ligand        | salt bridge | Hb between receptors residue-ligand                                                                                                                                                                                                                                                                                              | hydrophobic                                                                                                                                                                   | CH- $\pi$                                                                |
|---------------|-------------|----------------------------------------------------------------------------------------------------------------------------------------------------------------------------------------------------------------------------------------------------------------------------------------------------------------------------------|-------------------------------------------------------------------------------------------------------------------------------------------------------------------------------|--------------------------------------------------------------------------|
| FENT          | 2.9         | (Thr181) -(C=O): 3.05 Å                                                                                                                                                                                                                                                                                                          | Ile178, Leu182, Ala185, Met93 with Ar2;<br>Leu105, Phe107 with chair<br>Phe133, Val162, Val152 with Ar1                                                                       | Phe107- chair<br>Tyr103-Ar2<br>Phe133- Ar1<br>Tyr120-chair<br>Trp164-Ar1 |
| HALO          | 2.8         | COO <sup>-</sup> (Thr181) (C=O): 3.7 Å<br>(Tyr120) (C=O):3.8 Å<br>Halogen bond: oxygen form OH group of Ser205 with Ar1 (C-F): 4.12 Å<br>oxygen form C=O group of Thr202 with Ar1 (C-F): 4.01 Å                                                                                                                                  | Trp89, Trp164, Phe107 with Ar2;<br>Phe107, Tyr120 with chair<br>Thr181, Leu105, Tyr103, Tyr120 with link<br>Tyr103, Leu182 with Ar1                                           | Trp89- Ar2<br>Tyr103- Ar1<br>Tyr120-chair, Ar2<br>Trp164-Ar2             |
| MORPH         | 3.2<br>3.6  | Hb oxygen atom OH (Tyr120) with oxygen<br>-O- (C-O):2.7 Å<br>Hb oxygen atom NH (Gly118) with oxygen<br>-O- (C-O): 4.0 Å<br>Hb oxygen atom C=O(backbone of Ala86)<br>with oxygen OH (OH):2.7 Å<br>Hb oxygen atom NH(backbone of Ala185)<br>with oxygen OH (OH):3.5 Å + CH <sub>3</sub> (sidechain of Ala185) with OH (OH): 3.22 Å | Trp89, Trp164 with Ar(T);<br>Phe107, Trp164 with CH <sub>2</sub><br>Ile124 with chair<br>Val84 with Link                                                                      | Trp89<br>Phe107<br>Tyr103<br>Tyr120<br>Trp164<br>Phe184                  |
| <i>R</i> -PTZ | 2.9         |                                                                                                                                                                                                                                                                                                                                  | Trp164, Phe107 with Ar(T);<br>Ala185 with Me<br>Phe107 with CH <sub>2</sub><br>Tyr120 with chair<br>Ile178, Tyr103, Ile124, Leu105, Glu172 with Link                          | Phe107,<br>Tyr120                                                        |
| <i>S</i> -PTZ | 2.9         | Hb oxygen atom C=O(backbone of Ala86)<br>with oxygen OH (OH):3.2 Å                                                                                                                                                                                                                                                               | Ala185 with Me<br>Ile124 with CH <sub>2</sub><br>Phe107 with chair<br>Ile178, Tyr103, Leu105, Glu172 with Link                                                                | Phe107,<br>Tyr120                                                        |
| <i>R</i> -PHZ | 3.8         | Hb oxygen atom C=O(backbone of Ala86) with oxygen OH (OH(T)):2.7 Å                                                                                                                                                                                                                                                               | Ala86, Phe184 with Ar(T);<br>Phe107, Trp164 with Me<br>Tyr120 with CH <sub>2</sub><br>Phe107 with chair<br>Ile124 with Link<br>Ile178, Tyr103, Ala185, Thr181, Leu182 with Ar | Trp89<br>Tyr103<br>Phe107,<br>Tyr120<br>Trp164                           |
| <i>S</i> -PHZ | 3.0         | Hb oxygen atom C=O(backbone of Ala86) with oxygen OH (OH(T)):3.0 Å<br>Hb oxygen atom C=O(backbone of Trp89) with oxygen OH (OH(T)):3.2 Å                                                                                                                                                                                         | Ala86, Trp89, Val84 with Ar(T);<br>Tyr120, Ile124, Ala185 with Me<br>Phe107 with chair<br>Ile124 with Link<br>Val152, Phe133, Val162, His154 with Ar                          | Phe107,<br>Tyr120                                                        |

Figure S3. Spectrum of the frequency of the contacts between receptor residues and atomic centers of ligands.

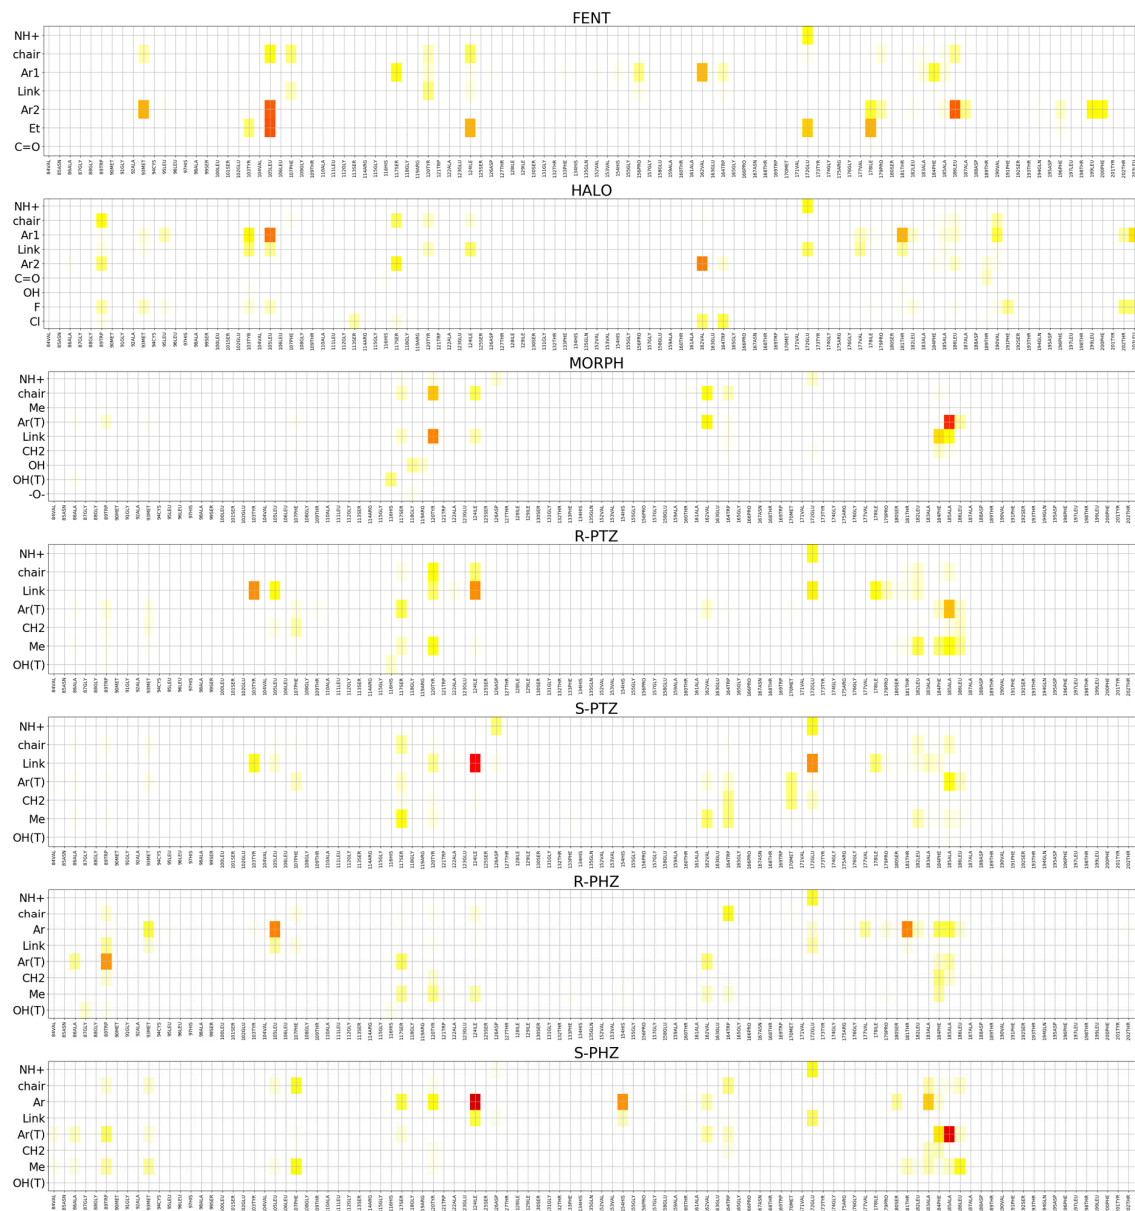

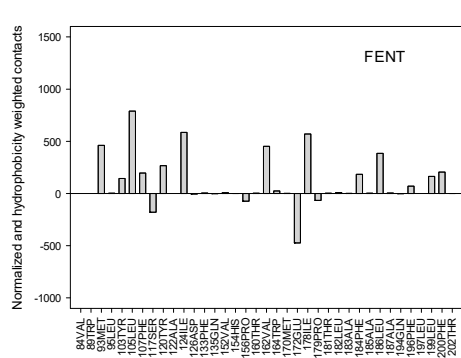

(a)

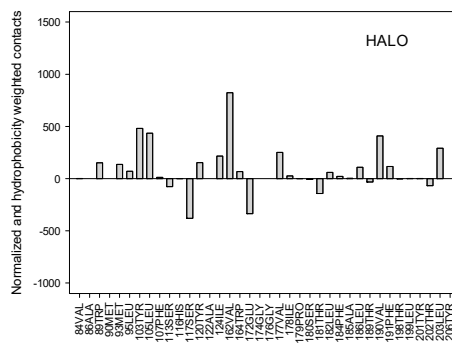

(b)

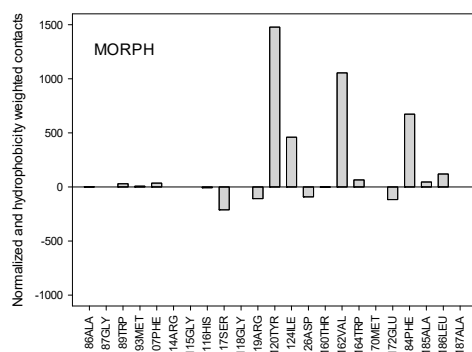

(c)

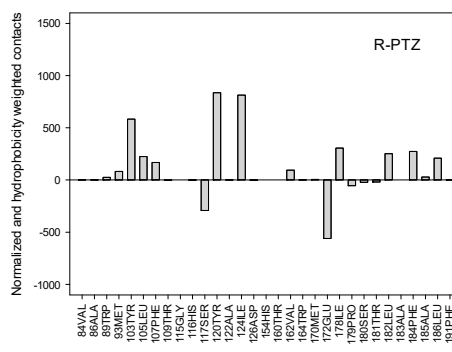

(d)

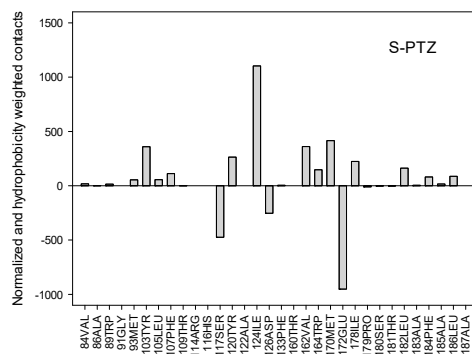

(e)

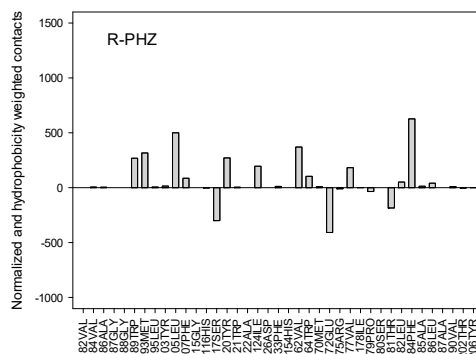

(f)

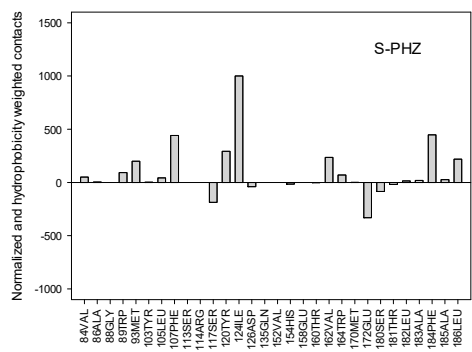

(g)

**Figure S4, a-g.** Spectrum of frequency of ligand contacts with receptor residues normalized according to the hydrophobic scale [40]. The positive bars correspond to hydrophobic while negative to hydrophilic contacts.
